# Supplementary material for: The combined effect of lifestyle factors and polygenic scores on age at onset in Parkinson’s disease
Source: PubMed Central journal article supplement (PMC11199580; doi:10.1038/s41598-024-65640-x), 2024-06-25
Supplement: 41598_2024_65640_MOESM1_ESM.pdf [file 41598_2024_65640_MOESM1_ESM.pdf]

**SUPPLEMENTARY MATERIAL FOR**

**The combined effect of lifestyle factors and polygenic scores on age at onset in Parkinson's disease**

Carolin Gabbert<sup>1</sup>, MSc, Leonie Blöbaum<sup>1</sup>, BSc, Theresa Lüth<sup>1</sup>, MSc, Prof. Inke R. König<sup>2</sup>, Amke Caliebe<sup>3</sup>, PhD, Sebastian Sendel<sup>3</sup>, MSc, Björn-Hergen Laabs<sup>2</sup>, PhD, Christine Klein<sup>1</sup>, MD, Joanne Trinh<sup>1\*</sup>, PhD

**Author affiliations:**

<sup>1</sup>Institute of Neurogenetics, University of Lübeck, Lübeck, Germany

<sup>2</sup>Institute of Medical Biometry and Statistics, University of Lübeck, Lübeck, Germany

<sup>3</sup>Institute of Medical Informatics and Statistics, Kiel University, University Hospital Schleswig-Holstein, Kiel, Germany

**\*Correspondence to: Joanne Trinh**

University of Lübeck

Ratzeburger Allee 160

23538 Lübeck, Germany

Email: joanne.trinh@uni-luebeck.de

Tel.: +49-451-31018202

## SUPPLEMENTARY FIGURES

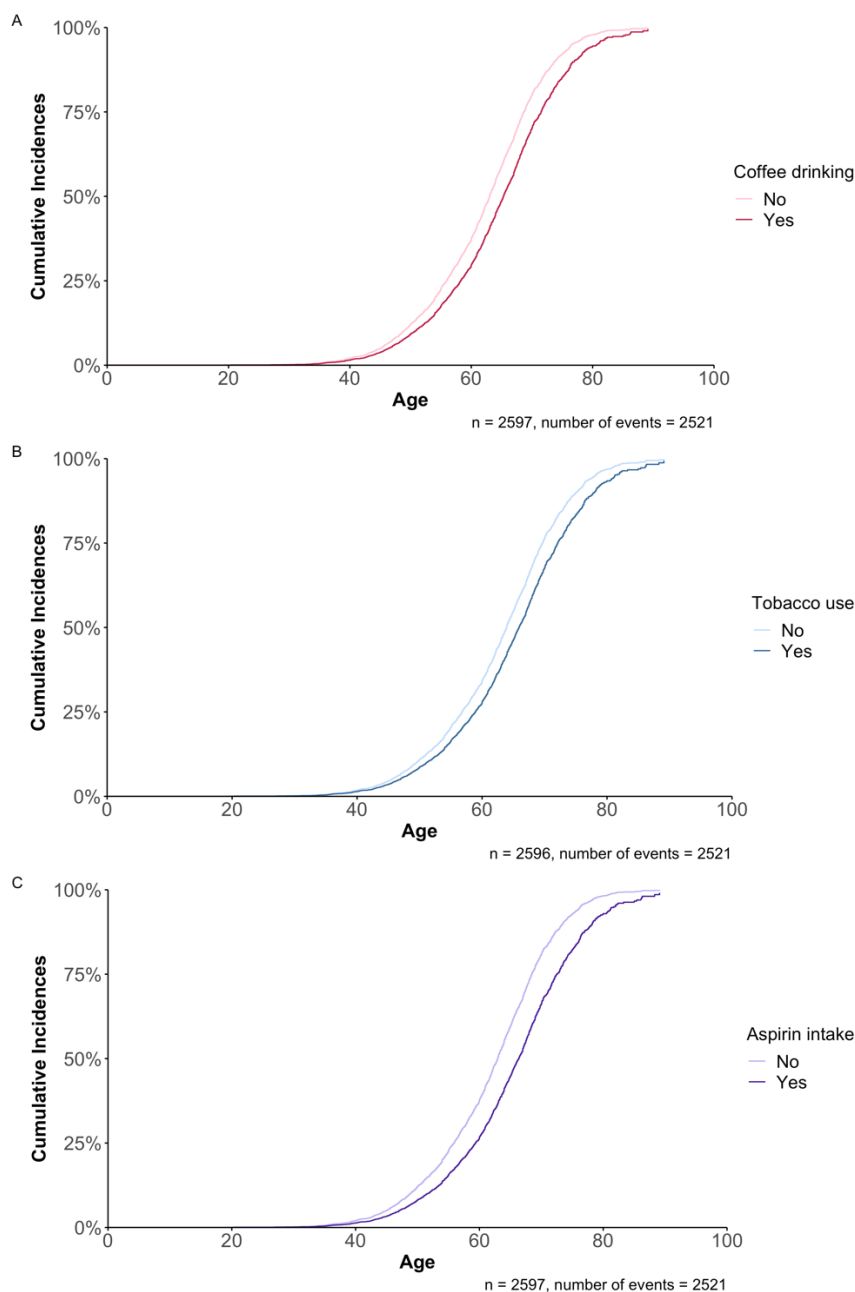

**Supplementary Figure 1. Plot of the Cox proportional hazards models to investigate the association between the lifestyle factors coffee drinking, tobacco use, and aspirin intake on the AAO of PD patients, while censoring with the AAE of healthy controls.**

(A) The different curves describe the coffee drinkers and non-coffee drinkers. A Cox proportional hazards model was used to investigate the difference in AAO while censoring with the AAE of healthy controls. The sex and the study site were additionally included as covariates ( $\rightarrow$  `coxph(formula = Surv(AAO/AAE, Diagnosis) ~ Coffee + Sex + Study, data = data)`) (B) The different curves describe the tobacco users and non-tobacco users. A Cox proportional hazards model was used to investigate the difference in AAO while censoring with the AAE of healthy controls. The sex and the study site were additionally included as covariates ( $\rightarrow$  `coxph(formula = Surv(AAO/AAE, Diagnosis) ~ Tobacco + Sex + Study, data = data)`) (C) The different curves describe the aspirin users and non-aspirin users. A Cox proportional hazards model was used to investigate the difference in AAO while censoring with the AAE of healthy controls. The sex and the study site were additionally included as covariates ( $\rightarrow$  `coxph(formula = Surv(AAO/AAE, Diagnosis) ~ Aspirin + Sex + Study, data = data)`)

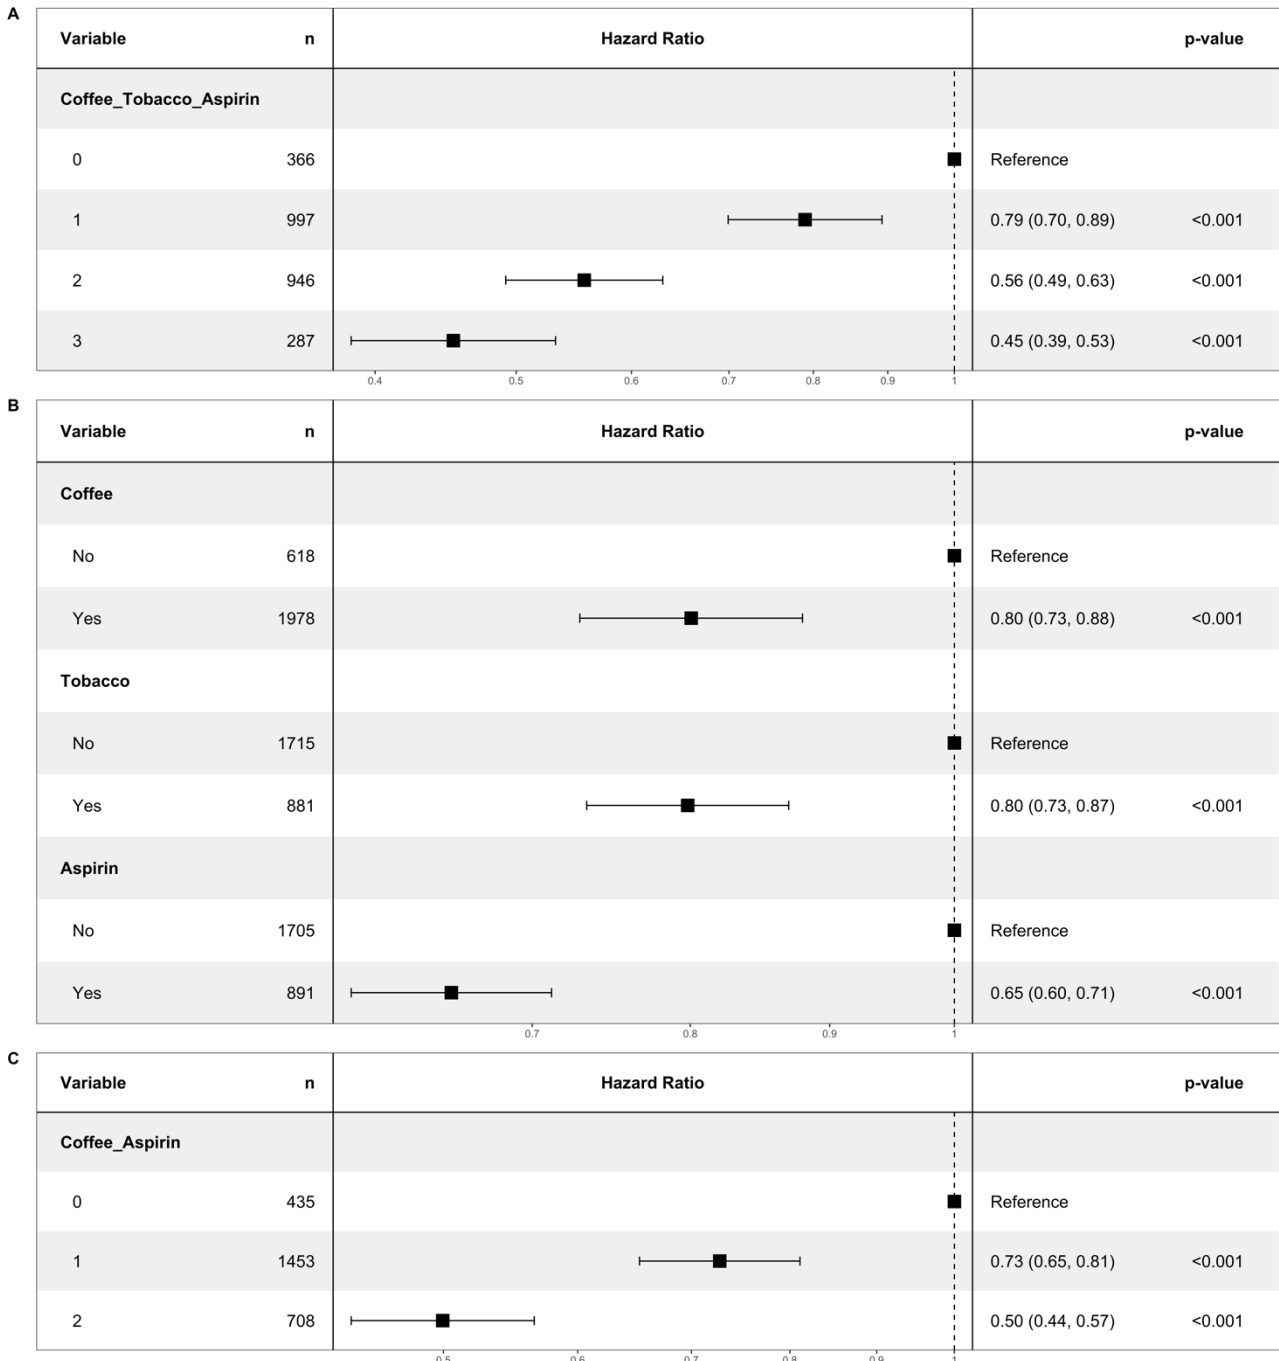

**Supplementary Figure 2. Plot of the Cox proportional hazards model to investigate the additive effects between the use of the lifestyle factors coffee drinking, tobacco use, and aspirin intake on the AAO of PD patients, while censoring with the AAE of healthy controls.**

(A) The use of the lifestyle factors coffee drinking, tobacco use, and aspirin intake was used as cumulative number (0-3). The sex and study site were additionally included as covariables but are not displayed. ( $\rightarrow$  `coxph(formula = Surv(AAO/AAE, Diagnosis) ~ Coffee/Tobacco/Aspirin + Sex + Study, data = data)`). (B) The lifestyle factors coffee drinking, tobacco use, and aspirin intake were included as separate covariables. The sex and study site were additionally included as covariables but are not displayed. ( $\rightarrow$  `coxph(formula = Surv(AAO/AAE, Diagnosis) ~ Coffee + Tobacco + Aspirin + Sex + Study, data = data)`). (C) The use of the lifestyle factors coffee drinking and aspirin intake was used as cumulative number (0-2). The sex and study site were additionally included as covariables but are not displayed. ( $\rightarrow$  `coxph(formula = Surv(AAO/AAE, Diagnosis) ~ Coffee/Aspirin + Sex + Study, data = data)`).

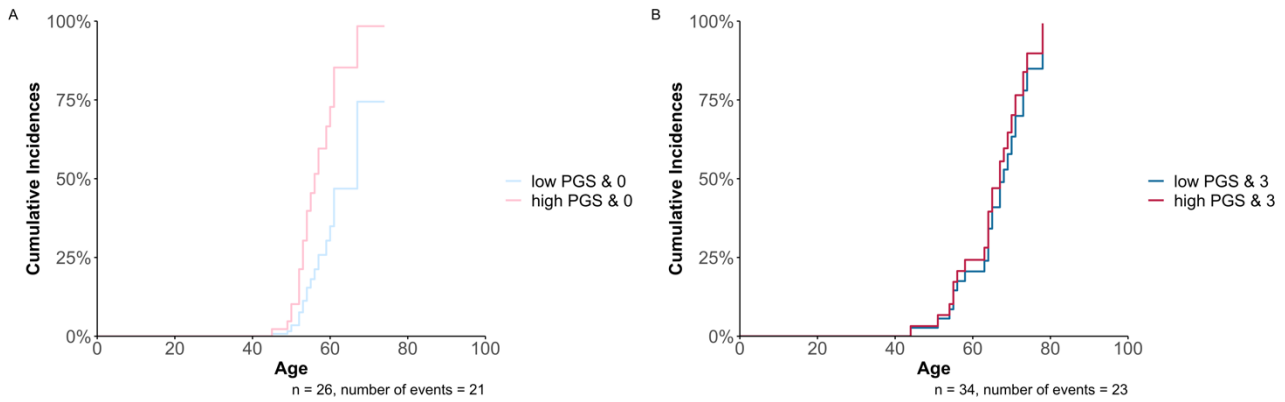

**Supplementary Figure 3. Additive effects of the PGS and lifestyle factors on the AAO of PD patients, while censoring with the AAE of healthy controls.**

**(A)** The different curves describe the PGS categorized into “low PGS” and “high PGS” according to the median PGS in the subgroup of participants that used no protective lifestyle factor. A Cox proportional hazards model was used to investigate the difference in AAO while censoring with the AAE of healthy controls. The sex and the first two PCs were additionally included ( $\rightarrow$  `coxph(formula = Surv(AAO/AAE, Diagnosis) ~ PGS low/high + Sex + PC1 + PC2, data = data_Coffee/Tobacco/Aspirin 0)`). **(B)** The different curves describe the PGS categorized into “low PGS” and “high PGS” according to the median PGS in the subgroup of participants that used all three protective lifestyle factors. A Cox proportional hazards model was used to investigate the difference in AAO while censoring with the AAE of healthy controls. The sex and the first two PCs were additionally included ( $\rightarrow$  `coxph(formula = Surv(AAO/AAE, Diagnosis) ~ PGS low/high + Sex + PC1 + PC2, data = data_Coffee/Tobacco/Aspirin 3)`).

SUPPLEMENTARY TABLES

**Supplementary Table 1. Linear model on the association of coffee drinking, tobacco use, and aspirin intake with AAO in the *GBA1*-PD study group**

|                                                                   | Estimate | Standard error | <i>p</i> -value               |   |
|-------------------------------------------------------------------|----------|----------------|-------------------------------|---|
| <b>Coffee drinking (binary) (<i>n</i> = 145)<sup>1</sup></b>      |          |                |                               |   |
| Intercept                                                         | 58.8245  | 1.9240         | <b>&lt;2x10<sup>-16</sup></b> | * |
| Coffee drinking (binary)                                          | 3.3597   | 2.0773         | 0.1080                        |   |
| Sex (Male)                                                        | 0.5488   | 1.6176         | 0.7349                        |   |
| <b>Coffee drinking dosage (<i>n</i> = 113)<sup>1</sup></b>        |          |                |                               |   |
| Intercept                                                         | 60.7349  | 1.5662         | <b>&lt;2x10<sup>-16</sup></b> | * |
| Coffee drinking dosage                                            | 0.0791   | 0.1137         | 0.4878                        |   |
| Sex (Male)                                                        | 0.7757   | 1.7817         | 0.6641                        |   |
| <b>Coffee drinking duration (<i>n</i> = 93)<sup>1</sup></b>       |          |                |                               |   |
| Intercept                                                         | 55.2783  | 1.7340         | <b>&lt;2x10<sup>-16</sup></b> | * |
| Coffee drinking duration                                          | 0.2423   | 0.0455         | <b>7x10<sup>-7</sup></b>      | * |
| Sex (Male)                                                        | -0.4705  | 1.9440         | 0.8093                        |   |
| <b>Tobacco use (binary) (<i>n</i> = 149)<sup>1</sup></b>          |          |                |                               |   |
| Intercept                                                         | 60.2231  | 1.2026         | <b>&lt;2x10<sup>-16</sup></b> | * |
| Tobacco use (binary)                                              | 3.6527   | 1.5808         | <b>0.0223</b>                 | * |
| Sex (Male)                                                        | 0.9111   | 1.5198         | 0.5498                        |   |
| <b>Tobacco use dosage (<i>n</i> = 124)<sup>1</sup></b>            |          |                |                               |   |
| Intercept                                                         | 60.8739  | 1.2053         | <b>&lt;2x10<sup>-16</sup></b> | * |
| Tobacco use dosage                                                | 0.1386   | 0.0791         | 0.0823                        |   |
| Sex (Male)                                                        | -0.2229  | 1.6733         | 0.8942                        |   |
| <b>Tobacco use duration (<i>n</i> = 121)<sup>1</sup></b>          |          |                |                               |   |
| Intercept                                                         | 60.7810  | 1.2286         | <b>&lt;2x10<sup>-16</sup></b> | * |
| Tobacco use duration                                              | 0.2193   | 0.0882         | <b>0.0143</b>                 | * |
| Sex (Male)                                                        | 0.3614   | 1.6704         | 0.8291                        |   |
| <b>Aspirin intake (binary) (<i>n</i> = 92)<sup>1</sup></b>        |          |                |                               |   |
| Intercept                                                         | 59.3073  | 1.6076         | <b>&lt;2x10<sup>-16</sup></b> | * |
| Aspirin intake (binary)                                           | 3.5143   | 2.2708         | 0.1253                        |   |
| Sex (Male)                                                        | 1.1559   | 2.0902         | 0.5816                        |   |
| <b>Aspirin intake dosage (<i>n</i> = 88)<sup>1</sup></b>          |          |                |                               |   |
| Intercept                                                         | 59.3123  | 1.4826         | <b>&lt;2x10<sup>-16</sup></b> | * |
| Aspirin intake dosage                                             | 0.4355   | 0.2213         | 0.0524                        |   |
| Sex (Male)                                                        | 1.5660   | 2.0077         | 0.4376                        |   |
| <b>Aspirin intake duration (<i>n</i> = 83)<sup>1</sup></b>        |          |                |                               |   |
| Intercept                                                         | 58.985   | 1.5121         | <b>&lt;2x10<sup>-16</sup></b> | * |
| Aspirin intake duration                                           | 0.4810   | 0.2066         | <b>0.0224</b>                 | * |
| Sex (Male)                                                        | 1.7848   | 2.0705         | 0.3913                        |   |
| <b>All lifestyle factors (binary) (<i>n</i> = 89)<sup>2</sup></b> |          |                |                               |   |
| Intercept                                                         | 56.4789  | 2.7708         | <b>&lt;2x10<sup>-16</sup></b> | * |
| Coffee drinking (binary)                                          | 0.2295   | 2.8641         | 0.9363                        |   |
| Tobacco use (binary)                                              | 6.7844   | 2.1707         | <b>0.0024</b>                 | * |
| Aspirin intake (binary)                                           | 2.1989   | 2.2613         | 0.3336                        |   |
| Sex (Male)                                                        | 1.8093   | 2.0733         | 0.3853                        |   |

<sup>1</sup>glm(formula = AAO ~ Lifestyle factor + Sex, family = gaussian, data=data).

<sup>2</sup>glm(formula = AAO ~ Coffee drinking (binary) + Tobacco use (binary) + Aspirin intake (binary) + Sex, family = gaussian, data=data).

\* *p*-value < 0.05 are highlighted in bold.

Abbreviations: AAO, age at onset; PD, Parkinson's disease; glm, generalized linear model.

**Supplementary Table 2. Linear model on the association of coffee drinking, tobacco use, and aspirin intake with AAO using *GBAI* mutation carrier status (*GBAI*-PD vs. iPD) as another covariate**

|                                                                     | Estimate | Standard error | <i>p</i> -value      |   |
|---------------------------------------------------------------------|----------|----------------|----------------------|---|
| <b>Coffee drinking (binary) (<i>n</i> = 2666)<sup>1</sup></b>       |          |                |                      |   |
| Intercept                                                           | 57.4021  | 0.4039         | <2x10 <sup>-16</sup> | * |
| Coffee drinking (binary)                                            | 2.9247   | 0.4293         | 2x10 <sup>-11</sup>  | * |
| Sex (Male)                                                          | 1.1880   | 0.3657         | <b>0.0012</b>        | * |
| <i>GBAI</i> mutation status ( <i>GBAI</i> -PD)                      | 1.4501   | 0.8007         | 0.0702               |   |
| <b>Coffee drinking dosage (<i>n</i> = 2438)<sup>1</sup></b>         |          |                |                      |   |
| Intercept                                                           | 58.7078  | 0.3216         | <2x10 <sup>-16</sup> | * |
| Coffee drinking dosage                                              | 0.0815   | 0.0193         | 2x10 <sup>-5</sup>   | * |
| Sex (Male)                                                          | 1.0858   | 0.3880         | <b>0.0052</b>        | * |
| <i>GBAI</i> mutation status ( <i>GBAI</i> -PD)                      | 2.0984   | 0.8989         | <b>0.0197</b>        | * |
| <b>Coffee drinking duration (<i>n</i> = 1816)<sup>1</sup></b>       |          |                |                      |   |
| Intercept                                                           | 55.5061  | 0.3723         | <2x10 <sup>-16</sup> | * |
| Coffee drinking duration                                            | 0.1791   | 0.0099         | <2x10 <sup>-16</sup> | * |
| Sex (Male)                                                          | -0.4503  | 0.4184         | 0.2821               |   |
| <i>GBAI</i> mutation status ( <i>GBAI</i> -PD)                      | 1.4076   | 0.9306         | 0.1306               |   |
| <b>Tobacco use (binary) (<i>n</i> = 2670)<sup>1</sup></b>           |          |                |                      |   |
| Intercept                                                           | 58.8585  | 0.2913         | <2x10 <sup>-16</sup> | * |
| Tobacco use (binary)                                                | 2.0021   | 0.3847         | 2x10 <sup>-7</sup>   | * |
| Sex (Male)                                                          | 1.3576   | 0.3645         | <b>0.0002</b>        | * |
| <i>GBAI</i> mutation status ( <i>GBAI</i> -PD)                      | 1.7411   | 0.7919         | <b>0.0280</b>        | * |
| <b>Tobacco use dosage (<i>n</i> = 2410)<sup>1</sup></b>             |          |                |                      |   |
| Intercept                                                           | 59.1459  | 0.2808         | <2x10 <sup>-16</sup> | * |
| Tobacco use dosage                                                  | 0.0681   | 0.0125         | 6x10 <sup>-8</sup>   | * |
| Sex (Male)                                                          | 1.0795   | 0.3832         | <b>0.0049</b>        | * |
| <i>GBAI</i> mutation status ( <i>GBAI</i> -PD)                      | 1.4818   | 0.8588         | 0.0846               |   |
| <b>Tobacco use duration (<i>n</i> = 2180)<sup>1</sup></b>           |          |                |                      |   |
| Intercept                                                           | 59.9896  | 0.2977         | <2x10 <sup>-16</sup> | * |
| Tobacco use duration                                                | 0.1311   | 0.0221         | 3x10 <sup>-9</sup>   | * |
| Sex (Male)                                                          | 0.9518   | 0.4015         | <b>0.0178</b>        | * |
| <i>GBAI</i> mutation status ( <i>GBAI</i> -PD)                      | 1.8386   | 0.8750         | <b>0.0357</b>        | * |
| <b>Aspirin intake (binary) (<i>n</i> = 2612)<sup>1</sup></b>        |          |                |                      |   |
| Intercept                                                           | 58.2492  | 0.2813         | <2x10 <sup>-16</sup> | * |
| Aspirin intake (binary)                                             | 4.6349   | 0.3854         | <2x10 <sup>-16</sup> | * |
| Sex (Male)                                                          | 0.7787   | 0.3656         | <b>0.0333</b>        | * |
| <i>GBAI</i> mutation status ( <i>GBAI</i> -PD)                      | 0.9098   | 0.9778         | 0.3522               |   |
| <b>Aspirin intake dosage (<i>n</i> = 2495)<sup>1</sup></b>          |          |                |                      |   |
| Intercept                                                           | 58.8474  | 0.2811         | <2x10 <sup>-16</sup> | * |
| Aspirin intake dosage                                               | 0.2684   | 0.0383         | 3x10 <sup>-12</sup>  | * |
| Sex (Male)                                                          | 1.0059   | 0.3757         | <b>0.0075</b>        | * |
| <i>GBAI</i> mutation status ( <i>GBAI</i> -PD)                      | 1.1040   | 1.0053         | 0.2722               |   |
| <b>Aspirin intake duration (<i>n</i> = 2166)<sup>1</sup></b>        |          |                |                      |   |
| Intercept                                                           | 58.6431  | 0.2888         | <2x10 <sup>-16</sup> | * |
| Aspirin intake duration                                             | 0.2948   | 0.0285         | <2x10 <sup>-16</sup> | * |
| Sex (Male)                                                          | 0.5388   | 0.3982         | 0.1762               |   |
| <i>GBAI</i> mutation status ( <i>GBAI</i> -PD)                      | 1.3935   | 1.0246         | 0.1739               |   |
| <b>All lifestyle factors (binary) (<i>n</i> = 2610)<sup>2</sup></b> |          |                |                      |   |
| Intercept                                                           | 56.1502  | 0.4099         | <2x10 <sup>-16</sup> | * |
| Coffee drinking (binary)                                            | 2.3116   | 0.4313         | 9x10 <sup>-8</sup>   | * |
| Tobacco use (binary)                                                | 1.5787   | 0.3858         | 4x10 <sup>-5</sup>   | * |
| Aspirin intake (binary)                                             | 4.5174   | 0.3820         | <2x10 <sup>-16</sup> | * |
| Sex (Male)                                                          | 0.4930   | 0.3643         | 0.1761               |   |
| <i>GBAI</i> mutation status ( <i>GBAI</i> -PD)                      | 0.5397   | 0.9842         | 0.5835               |   |

<sup>1</sup>glm(formula = AAO ~ Lifestyle factor + Sex + *GBAI* mutation status, family = gaussian, data=data).

<sup>2</sup>glm(formula = AAO ~ Coffee drinking (binary) + Tobacco use (binary) + Aspirin intake (binary) + Sex + *GBAI* mutation status, family = gaussian, data=data).

\* *p*-value < 0.05 are highlighted in bold.

Abbreviations: AAO, age at onset; PD, Parkinson's disease; glm, generalized linear model.
